# Supplementary material
Source: MDPI journal article supplement (https://www.mdpi.com/2571-9408/6/3/140)
Supplement: s1 [file s1]

SM 1. Comparison Colorimetric Values of the samples.

| Samples-series 1-treated with calcium nano-hydroxide in propanol |              |              |              |              |
|------------------------------------------------------------------|--------------|--------------|--------------|--------------|
| <b>C.N-h.1.</b>                                                  | $\Delta L^*$ | $\Delta a^*$ | $\Delta b^*$ | $\Delta E^*$ |
| Paper                                                            | 0.77         | -0.32        | -0.02        | <b>0.84</b>  |
| Violet                                                           | -1.28        | -0.81        | 0.16         | <b>1.52</b>  |
| Orange                                                           | 0.31         | -0.09        | -1.99        | <b>2.02</b>  |
| Blue                                                             | 1.03         | -0.68        | 3.23         | <b>3.46</b>  |
| Black                                                            | 3.09         | -0.79        | -1.21        | <b>3.41</b>  |
| <b>C.N-h.2.</b>                                                  |              |              |              |              |
| Paper                                                            | 0.24         | -0.24        | -0.02        | <b>0.34</b>  |
| Violet                                                           | -0.59        | -0.8         | 0.27         | <b>1.03</b>  |
| Orange                                                           | -0.06        | 0.07         | -2.41        | <b>2.42</b>  |
| Blue                                                             | 1.57         | -3.2         | 4.19         | <b>5.5</b>   |
| Black                                                            | 1.47         | -0.19        | -2.3         | <b>2.73</b>  |
| <b>C.N-h.3.</b>                                                  |              |              |              |              |
| Paper                                                            | 1.04         | -0.62        | -0.18        | <b>1.22</b>  |
| Violet                                                           | -1.24        | 0.65         | -3.14        | <b>3.43</b>  |
| Orange                                                           | 1.97         | -0.29        | 0.24         | <b>2</b>     |
| Blue                                                             | 0.69         | 0.44         | 1.31         | <b>1.55</b>  |
| Black                                                            | 2.4          | -1.58        | -1.63        | <b>3.3</b>   |

| Samples-series1- treated with calcium propionate in ethanol |              |              |              |              |
|-------------------------------------------------------------|--------------|--------------|--------------|--------------|
| <b>C.P.1.</b>                                               | $\Delta L^*$ | $\Delta a^*$ | $\Delta b^*$ | $\Delta E^*$ |
| Paper                                                       | 0.76         | -0.23        | -0.33        | <b>0.86</b>  |
| Violet                                                      | 0.65         | -2.17        | 1.72         | <b>2.84</b>  |
| Orange                                                      | 0.22         | -0.38        | -3           | <b>3.03</b>  |
| Blue                                                        | 0.04         | 0.13         | 1.54         | <b>1.54</b>  |
| Black                                                       | 2.61         | 0.98         | -1.48        | <b>3.16</b>  |
| <b>C.P.2.</b>                                               |              |              |              |              |
| Paper                                                       | 0.89         | -0.53        | 0.13         | <b>1.05</b>  |
| Violet                                                      | -0.56        | -1.44        | 1.3          | <b>2.02</b>  |
| Orange                                                      | 0.74         | 0.77         | -1.74        | <b>2.05</b>  |
| Blue                                                        | 1.28         | -1.87        | 5.32         | <b>5.78</b>  |
| Black                                                       | 2.62         | -1.93        | -1.32        | <b>3.51</b>  |
| <b>C.P.3.</b>                                               |              |              |              |              |
| Paper                                                       | 0.5          | -0.35        | -0.51        | <b>0.79</b>  |
| Violet                                                      | -1.15        | -0.64        | -0.05        | <b>1.31</b>  |
| Orange                                                      | 0.68         | -0.54        | -4.48        | <b>4.56</b>  |
| Blue                                                        | 1.68         | -1.08        | 3.87         | <b>4.36</b>  |
| Black                                                       | 2.37         | -1.05        | -0.75        | <b>2.7</b>   |
